# Supplementary material for: Synthesis and X-ray diffraction structures of novel half-sandwich Os(ii)-and Ru(ii)-hydroxamate complexes
Source: Royal Society of Chemistry journal article supplement (doi:10.1039/c1ra00998b), 2011-12-20
Supplement: c1ra00998b.pdf [file c1ra00998b.pdf]

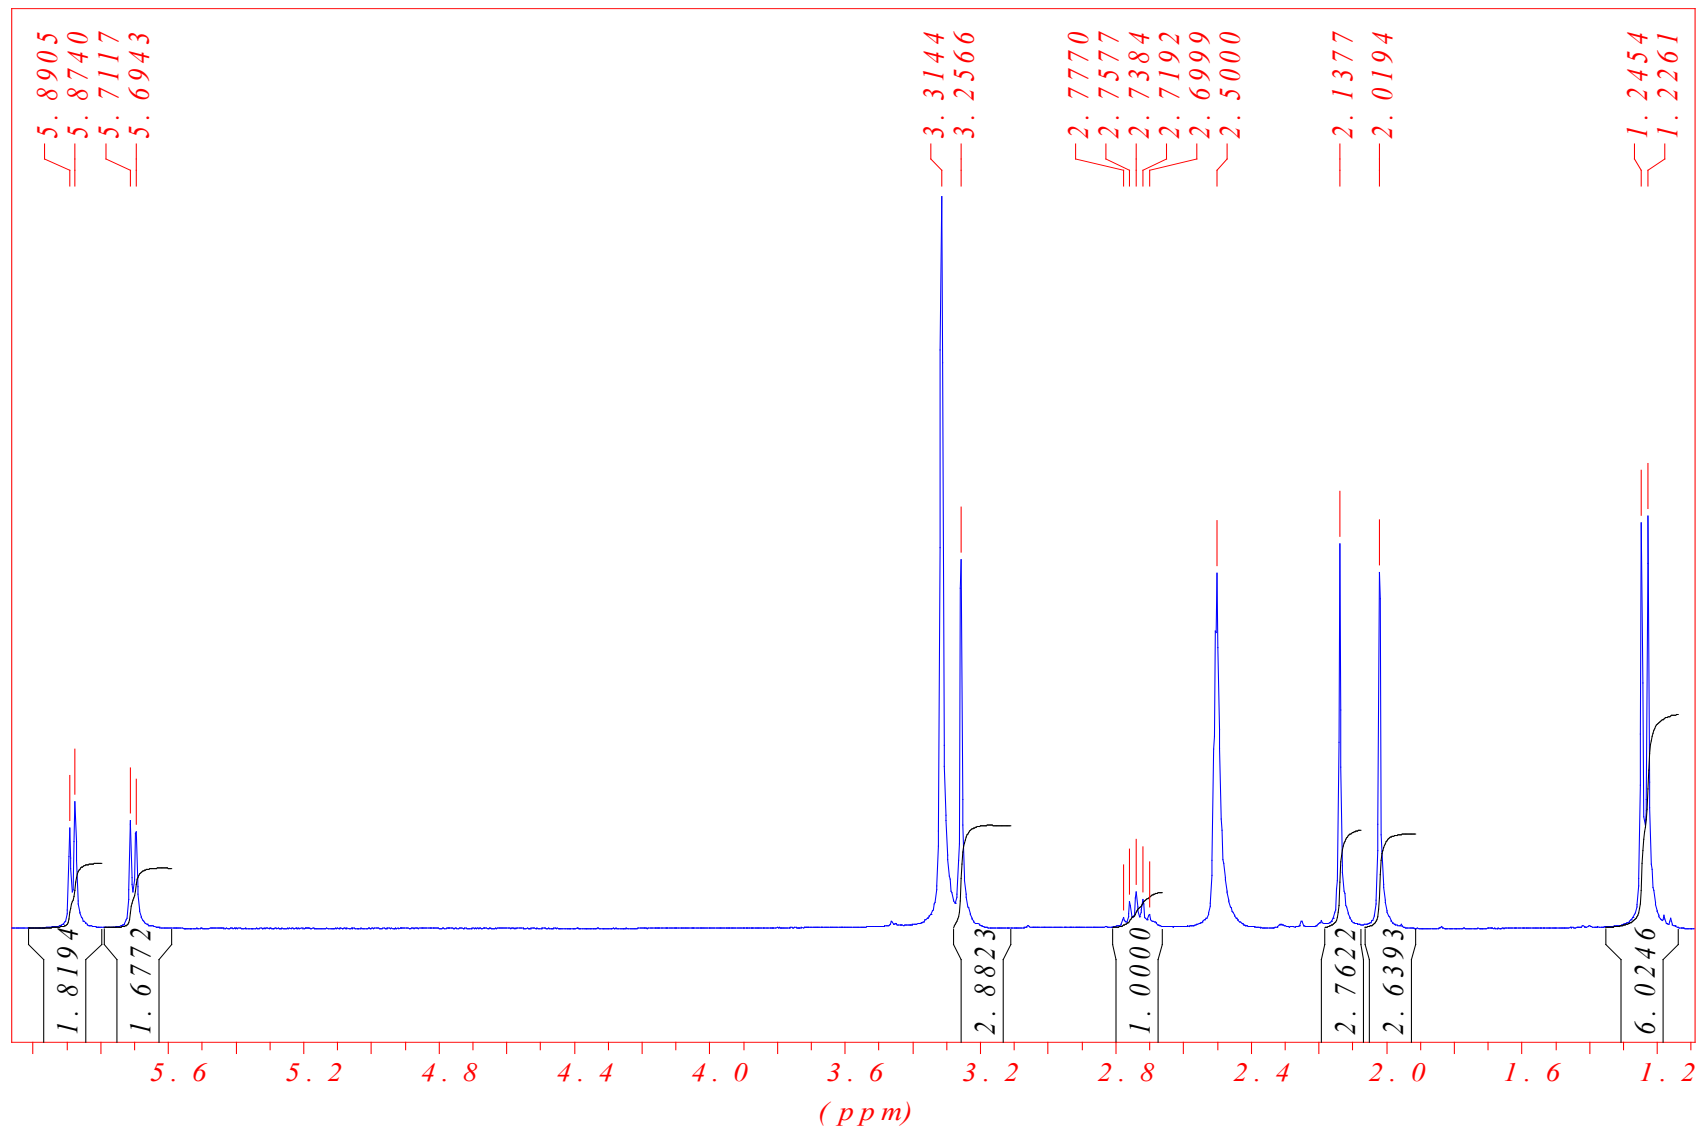

Figure S1 - <sup>1</sup>H-NMR spectrum of [Ru(η<sup>6</sup>-*p*-cym)(μ-meaha)]<sub>2</sub>(CF<sub>3</sub>SO<sub>3</sub>)<sub>2</sub> (5) in d<sup>6</sup>-DMSO

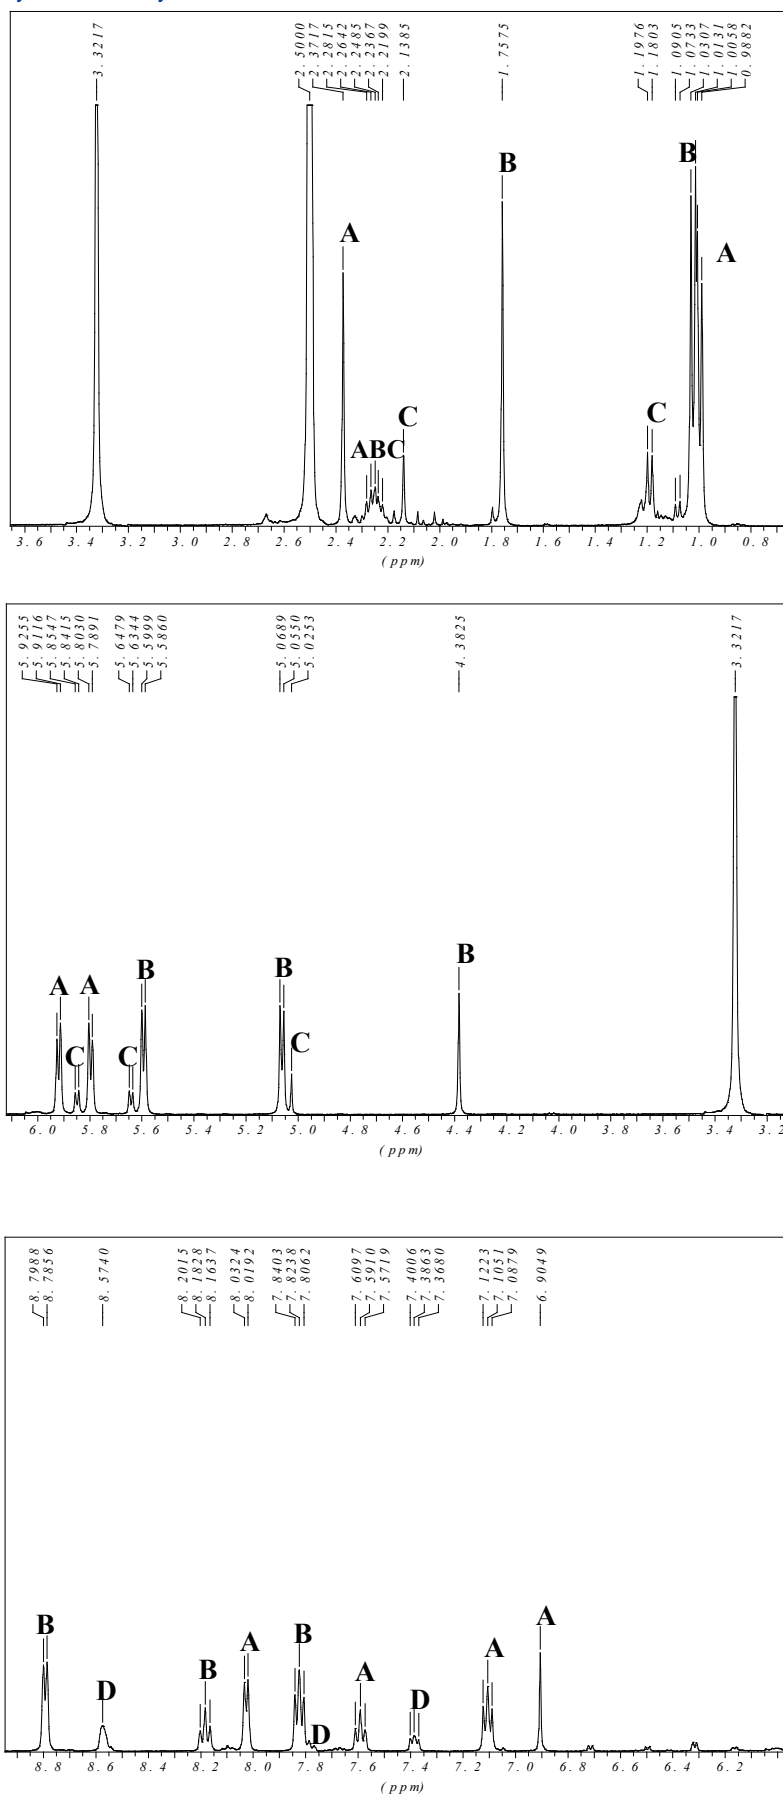

Fig. S2 - <sup>1</sup>H-NMR spectrum of  $[\text{Os}(\eta^6\text{-}p\text{-cym})(\square\text{-OH})\text{py}]_2(\text{CF}_3\text{SO}_3)_2$  (**16**) in  $d^6\text{-DMSO}$ . A-C indicate the species  $[\text{Os}(\text{py})(\eta^6\text{-}p\text{-cym})(\square\text{-OH})_2\text{Os}(\eta^6\text{-}p\text{-cym})]^{2+}$  (A),  $[\text{Os}(\eta^6\text{-}p\text{-cym})(\square\text{-OH})\text{py}]_2^{2+}$  (B) and  $[\text{Os}(\eta^6\text{-}p\text{-cym})(\square\text{-OH})]_2^{2+}$  (C) formed after partial or full dissociation of pyridine (D) in solution

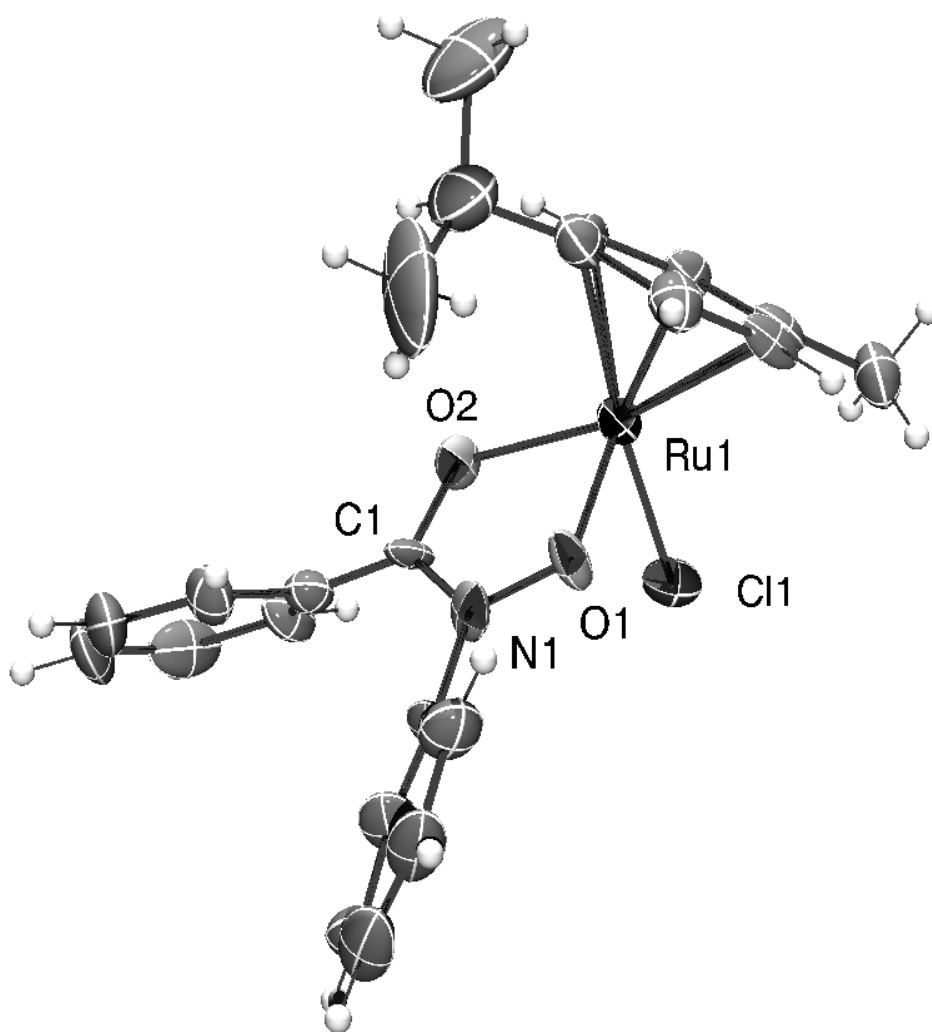

Figure S3 X-Ray structure of  $[\text{Ru}(\eta^6\text{-}p\text{-cym})(\text{phebha})\text{Cl}]$  (**9**). Thermal ellipsoids show 50 % probability with partial numbering scheme. Selected bond lengths (Å) and angles (°): Ru(1)-Cl(1) 2.411(3), Ru(1)-O(1) 2.097(14), Ru(1)-O(2) 2.062(15), Ru(1)-C<sub>arene</sub>(avr.) 2.166(23); O(1)-Ru(1)-O(2) 77.5(3), Cl(1)-Ru(1)-O(1) 85.3(5), Cl(1)-Ru(1)-O(2) 84.3(5).

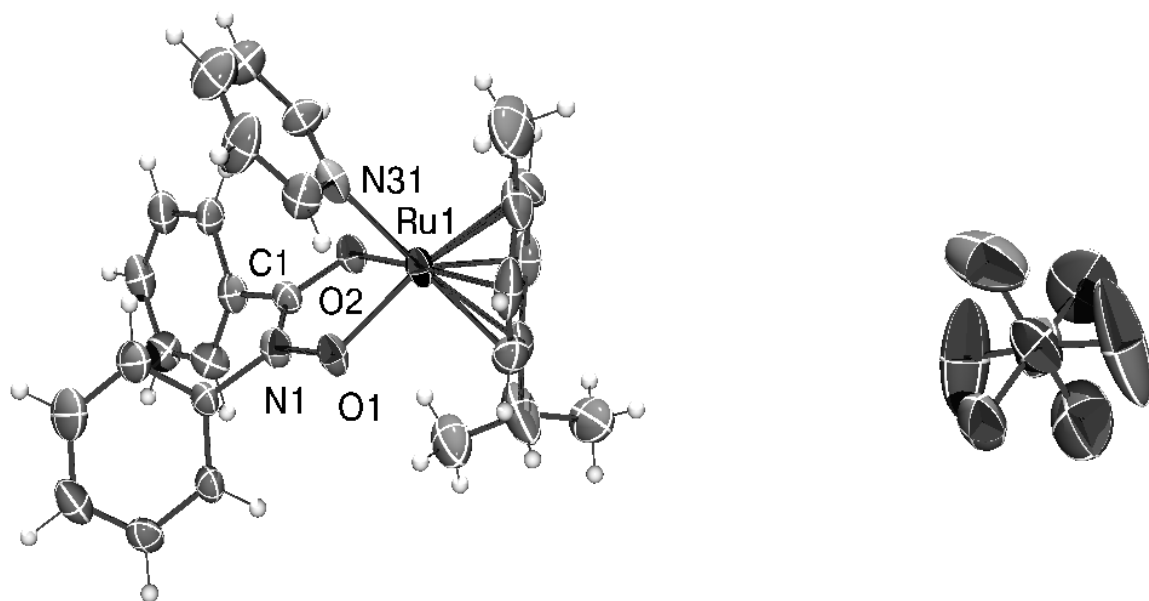

Figure S4 - X-Ray structure of  $[\text{Ru}(\eta^6\text{-}p\text{-cym})(\text{phebha})(\text{py})]\text{CF}_3\text{SO}_3$  (**14**). Thermal ellipsoids show 50 % probability with partial numbering scheme. Selected bond lengths (Å) and angles (°): Ru(1)-O(1) 2.029(7), Ru(1)-O(2) 2.075(6), Ru(1)-N(31) 2.144(10), Ru(1)-C<sub>arene</sub>(avr.) 2.17(4); O(1)-Ru(1)-O(2) 79.1(3), N(31)-Ru(1)-O(1) 82.3(3), N(31)-Ru(1)-O(2) 82.8(3).
